# Supplementary material for: Low-intensity extracorporeal shock wave therapy for erectile dysfunction: Myths and realities
Source: PubMed Central journal article supplement — Investig Clin Urol. 2023 Feb 7;64(2):118–25. doi: 10.4111/icu.20220327 (PMC9995960; doi:10.4111/icu.20220327), 2023-02-07
Supplement: icu-64-118-s001.pdf [file icu-64-118-s001.pdf]

Supplementary Table. Continued

| Year | Study design        | Author                | Eligible patients | Aetiology of ED <sup>a</sup> | Age (y)       | Duration of ED (y) | Shocks per treatment | Total shock | EFD (mL/mm <sup>2</sup> ) | IIEF-5          |                     |                 | EHS   |           |                  |         |           |
|------|---------------------|-----------------------|-------------------|------------------------------|---------------|--------------------|----------------------|-------------|---------------------------|-----------------|---------------------|-----------------|-------|-----------|------------------|---------|-----------|
|      |                     |                       |                   |                              |               |                    |                      |             |                           | Baseline        | 3 mo                | 6 mo            | 12 mo | Baseline  | 3 mo             | 6 mo    | 12 mo     |
| 2020 | Prospective study   | Huang et al. [34]     | 35                | 4                            | 33 (21–68)    | n/a                | 5,000                | 20,000      | 0.09                      | 10.60±5.99      | n/a                 | n/a             | n/a   | 3 (1–3)   | n/a              | n/a     | n/a       |
| 2020 | RCT                 | Kim et al. [35]       | 38                | 4                            | 63.2±5.4      | n/a                | 3,000                | 36,000      | n/a                       | n/a             | n/a                 | n/a             | n/a   | 2.5±0.9   | n/a              | n/a     | n/a       |
| 2020 | Comparative study   | Verze et al. [36]     | 78                | 3                            | 56.0±9.6      | n/a                | n/a                  | n/a         | 0.09                      | 15.5±2.8        | n/a                 | n/a             | n/a   | n/a       | n/a              | n/a     | n/a       |
|      |                     |                       | 26 <sup>b</sup>   |                              |               |                    | 1,500                | 9,000       |                           | 15.2            | 18.9                | 18.5            |       |           |                  |         |           |
|      |                     |                       | 26 <sup>b</sup>   |                              |               |                    | 1,800                | 10,800      |                           | 16.4            | 20.6                | 19.8            |       |           |                  |         |           |
|      |                     |                       | 26 <sup>b</sup>   |                              |               |                    | 2,400                | 14,400      |                           | 14.9            | 19.9                | 19.6            |       |           |                  |         |           |
| 2020 | Retrospective study | Wang et al. [37]      | 45                | 4                            | n/a           | n/a                | 10,000               | 80,000      | 0.05                      | n/a             | n/a                 | n/a             | n/a   | n/a       | n/a              | n/a     | n/a       |
|      |                     |                       | 7 <sup>b</sup>    |                              | 60 (30–81)    | 2.75 (1–5)         |                      |             |                           | 16 (16–18)      | 21 (20–23)          |                 |       |           |                  |         |           |
| 2020 | RCT                 | Sramkova et al. [38]  | 38 <sup>b</sup>   | 1                            | 61 (30–84)    | 3.58 (0.5–10)      | 6,000                | 24,000      | 0.16                      | 12.8±3.9        | 20.8 (19.3–22.3)    | n/a             | n/a   | 2.1±0.5   | 3.6 (3.3–3.8)    | n/a     | n/a       |
| 2020 | Comparative study   | Eryilmaz et al. [39]  | 40                | 1                            | n/a           | n/a                | 1,800                | 21,600      | 0.15                      | n/a             | n/a                 | n/a             | n/a   | n/a       | n/a              | n/a     | n/a       |
|      |                     |                       | 20 <sup>b</sup>   |                              | 44.3          |                    |                      |             |                           | 10.01±2.5       |                     |                 |       | 2.01±0.95 |                  |         |           |
|      |                     |                       | 20 <sup>b</sup>   |                              | 45.6          |                    |                      |             |                           | 9.6±2.9         |                     |                 |       | 2.1±0.73  |                  |         |           |
| 2020 | RCT                 | Beccagli et al. [40]  | 36                | 2                            | 64.6±5.3      | n/a                | 2,400                | 19,200      | 0.09                      | n/a             | n/a                 | n/a             | n/a   | n/a       | n/a              | n/a     | n/a       |
| 2021 | Prospective study   | Akande et al. [42]    | 22                | 1                            | 53.73±8.013   | n/a                | 1,500                | 18,000      | n/a                       | 8.27±2.741      | n/a                 | n/a             | n/a   | n/a       | n/a              | n/a     | n/a       |
| 2021 | RCT                 | Ladegaard et al. [43] | 20                | 2                            | 60.8±6.8      | n/a                | 4,000                | 20,000      | 0.15                      | 6.80±3.04       | n/a                 | n/a             | n/a   | 1.30±0.73 | n/a              | n/a     | n/a       |
| 2021 | Prospective study   | Lau et al. [44]       | 19                | 4                            | 57.4 (38–70)  | 3.86 (1–10)        | n/a                  | n/a         | n/a                       | n/a             | n/a                 | n/a             | n/a   | n/a       | n/a              | n/a     | n/a       |
|      |                     |                       | 16 <sup>b</sup>   |                              |               |                    |                      |             |                           | 13.1±5.7        |                     |                 |       | 2.44±1.03 |                  |         |           |
|      |                     |                       | 17 <sup>b</sup>   |                              |               |                    |                      |             |                           | 12.7±5.7        | 17.2±6.5            |                 |       | 2.41±1.00 | 2.82±0.95        |         |           |
|      |                     |                       | 11 <sup>b</sup>   |                              |               |                    |                      |             |                           | 11.6±6.0        |                     |                 |       | 2.18±1.08 |                  |         |           |
| 2021 | RCT                 | Shendy et al. [45]    | 21                | 3                            | 48.6±5.5      | 9.8±1.1            | 3,000                | 36,000      | 0.09                      | 12.75±3.21      | n/a                 | n/a             | n/a   | n/a       | n/a              | n/a     | n/a       |
| 2021 | Retrospective study | Tzou et al. [46]      | 69                | 4                            | 55 (45–66)    | 1 (0.5–3)          | 3,000                | 36,000      | 0.2                       | 10.5±5.54       | n/a                 | n/a             | n/a   | 2±0.80    | n/a              | n/a     | n/a       |
| 2021 | Comparative study   | Lei et al. [47]       | 46                | 4                            | 33.4±6.2      | 2 (1–3)            | 1,500                | 18,000      | 0.09                      | 14.09±3.75      | 21.52 (18.90–24.14) | n/a             | n/a   | 1.96±0.73 | 3.04 (2.77–3.31) | n/a     | n/a       |
| 2021 | Retrospective study | Geyik [48]            | 93                | 4                            | 51.23±11.36   | 3.97±2.97          | 3,600                | 18,000      | 0.09                      | n/a             | n/a                 | n/a             | n/a   | n/a       | n/a              | n/a     | n/a       |
| 2021 | Retrospective study | Garetta et al. [49]   | 111               | 1                            | 53.7±11.6     | n/a                | 2,400                | 14,400      | 0.12                      | 12.2±6.9        | 16.7±8.4            | 15.9±8.2        | n/a   | n/a       | n/a              | n/a     | n/a       |
| 2021 | Prospective study   | Palmeri et al. [50]   | 106               | 1                            | 57.9±10.7     | 2.78±2.35          | 3,000                | 18,000      | 0.25                      | n/a             | n/a                 | n/a             | n/a   | 2.19±0.52 | n/a              | n/a     | n/a       |
| 2021 | RCT                 | Vinay et al. [41]     | 40                | 1                            | 60 (54–66)    | 3 (2–6)            | 5,000                | 20,000      | 0.09                      | n/a             | n/a                 | n/a             | n/a   | n/a       | n/a              | n/a     | n/a       |
| 2021 | Prospective study   | Kanalose et al. [51]  | 34                | 2                            | 59.2±6.8      | n/a                | 1,500                | 18,000      | 0.09                      | n/a             | n/a                 | n/a             | n/a   | n/a       | n/a              | n/a     | n/a       |
| 2021 | RCT                 | Ortaç et al. [52]     | 44                | 1                            | 42.32±9.88    | 2.8±3.0            | 3,000                | 12,000      | 0.20                      | n/a             | n/a                 | n/a             | n/a   | n/a       | n/a              | n/a     | n/a       |
| 2022 | Prospective study   | Daneshwar et al. [53] | 50                | 4                            | 41.9±11.7     | n/a                | 3,000                | 30,000      | 0.25                      | n/a             | n/a                 | n/a             | n/a   | n/a       | n/a              | n/a     | n/a       |
| 2022 | Retrospective study | Geyik [54]            | 41                | 4                            | 51.61±11.80   | 4.54±2.75          | 3,600                | 36,000      | 0.09                      | n/a             | n/a                 | n/a             | n/a   | n/a       | n/a              | n/a     | n/a       |
| 2022 | Prospective study   | Ogniski et al. [55]   | 50                | 4                            | 59 (51–70)    | 4 (2–7)            | 3,000                | 18,000      | 0.22                      | 13 (8.75–17.25) | 17 (12–22)          | 13.5 (10–17.25) | n/a   | 1 (0–2)   | 2 (1–3)          | 2 (1–2) | n/a       |
| 2022 | RCT                 | Gallo et al. [56]     | 83                | 4                            | n/a           | n/a                | 3,000                | 18,000      | 0.25                      | n/a             | n/a                 | n/a             | n/a   | n/a       | n/a              | n/a     | n/a       |
|      |                     |                       | 41 <sup>b</sup>   |                              | 50.5±13.7     |                    |                      |             |                           |                 |                     |                 |       | 2.07±0.72 |                  |         | 3.17±0.67 |
|      |                     |                       | 42 <sup>b</sup>   |                              | 49.6±14.0     |                    |                      |             |                           |                 |                     |                 |       | 2.12±0.80 |                  |         | 2.95±0.76 |
| 2022 | Retrospective study | Ghahani et al. [57]   | 94                | 4                            | 56.6 (±10.74) | n/a                | n/a                  | n/a         | n/a                       | 12.71±5.27      | n/a                 | n/a             | n/a   | 2.01±0.94 | n/a              | n/a     | n/a       |
|      |                     |                       | 20 <sup>b</sup>   |                              |               |                    | 3,000                | 24,000      | 0.09                      | 9.50±5.05       |                     |                 |       | 1.55±1.07 |                  |         |           |
|      |                     |                       | 20 <sup>b</sup>   |                              |               |                    | 10,000               | 80,000      | n/a                       | 14.00±5.15      |                     |                 |       | 2.05±0.86 |                  |         |           |
|      |                     |                       | 31 <sup>b</sup>   |                              |               |                    | 3,000                | 24,000      | 0.09                      | 12.10±3.86      |                     |                 |       | 2.10±0.59 |                  |         |           |
|      |                     |                       | 23 <sup>b</sup>   |                              |               |                    | 10,000               | 80,000      | n/a                       | 15.43±5.56      |                     |                 |       | 2.29±1.12 |                  |         |           |

Supplementary Table. Continued

| Year | Study design      | Author                       | Eligible patients | Aetiology of ED <sup>a</sup> | Age (y)    | Duration of ED (y) | Shocks per treatment | Total shock | EFD (mJ/mm <sup>2</sup> ) | IIEF-5    |            |          | EHS       |           |         |      |
|------|-------------------|------------------------------|-------------------|------------------------------|------------|--------------------|----------------------|-------------|---------------------------|-----------|------------|----------|-----------|-----------|---------|------|
|      |                   |                              |                   |                              |            |                    |                      |             |                           | Baseline  | 3 mo       | 6 mo     | 12 mo     | Baseline  | 3 mo    | 6 mo |
| 2022 | RCT               | Kalyvanakis et al. [58]      | 35                | 1                            | 54 (47–63) | 5.67 (2.92–10.35)  | 5,000                | 60,000      | 0.09                      | n/a       | n/a        | n/a      | n/a       | n/a       | n/a     | n/a  |
| 2022 | RCT               | Sandoval-Salinas et al. [59] | 40                | 4                            | 47.4±12.8  | 5.5±6.6            | 6,000                | 36,000      | n/a                       | n/a       | n/a        | n/a      | n/a       | n/a       | n/a     | n/a  |
| 2022 | RCT               | Tao et al. [61]              | 33                | 3                            | 46.70±4.93 | 3.66±2.26          | 2,100                | 25,200      | n/a                       | n/a       | n/a        | n/a      | 1.85±0.36 | n/a       | n/a     | n/a  |
| 2022 | Prospective study | Cocci et al. [62]            | 5                 | 5                            | 31 (24–26) | n/a                | 3,000                | 24,000      | 0.25                      | 10 (8–13) | 21 (19–23) | n/a      | n/a       | n/a       | n/a     | n/a  |
| 2022 | Prospective study | Ergün et al. [63]            | 63                | 3                            | 57.11±5.06 | 2.10±0.46          | 5,000                | 60,000      | 0.15                      | 5.29±1.67 | 5.56±1.85  | n/a      | 1.46±0.50 | 1.48±0.50 | n/a     | n/a  |
| 2023 | RCT               | Chung et al. [60]            | 30                | 1                            | 45 (42–58) | 2.75 (0.67–4.92)   | 3,000                | 36,000      | 0.25                      | 14.6±3.8  | 18.8±3.8   | 18.8±3.8 | 1.4±0.6   | 2.6±0.5   | 2.6±0.4 | n/a  |

ED, erectile dysfunction; EFD, energy flux density; IIEF-5, International Index of Erectile Function-5; EHS, Erection Hardness Score; n/a, not available; RCT, randomized controlled trial.

<sup>a</sup>1, vasculogenic/organic; 2, postprostatectomy; 3, non defined/mixed.<sup>b</sup>The data of the subgroups separately analysed in the studies.
